# Supplementary material for: Synthesis and Spectroscopic Analysis of Novel 1H-Benzo[d]imidazoles Phenyl Sulfonylpiperazines
Source: Pharmaceuticals (Basel). 2012 May 3;5(5):460–8. doi: 10.3390/ph5050460 (PMC3763652; doi:10.3390/ph5050460)
Supplement: Correction — A correction was published on 24 September 2012: http://www.mdpi.com/1424-8247/5/9/1044 (PDF, 110 KB) [file pharmaceuticals-05-00460-s001.pdf]

Correction

**Qandil, A.M., Synthesis and Spectroscopic Analysis of Novel 1H-Benzo[d]imidazolyphenylsulfonylpiperazines. *Pharmaceuticals* 2012, 5, 460-468**

Amjad M. Qandil <sup>1,2</sup>

<sup>1</sup> Pharmaceutical Sciences Department, College of Pharmacy, King Saud bin Abdulaziz University for Health Sciences, Riyadh, 11426, Saudi Arabia; E-Mail: Qandila@ksau-hs.edu.sa; Tel.: +966-1-252-00-88 (ext. 51091); Mobile: +966-5-68-93-81-82

<sup>2</sup> Department of Medicinal Chemistry and Pharmacognosy, Faculty of Pharmacy, Jordan University of Science and Technology, Irbid 22110, Jordan; E-Mail: drqandil@just.edu.jo

Received: 18 September 2012 / Published: 24 September 2012

---

We have found the following errors in the title of this article which was recently published in *Pharmaceuticals* [1]:

1. The correct title should be: **Synthesis and Spectroscopic Analysis of Novel 1H-Benzo[d]imidazolyphenylsulfonylpiperazines.**
2. The phrase “phenyl sulfonylpiperazines” should be replaced by “phenylsulfonylpiperazines” whenever mentioned in the article, namely in the Keywords, page 460, and in the penultimate line of page 465.

**Reference**

1. Qandil, A.M. Synthesis and Spectroscopic Analysis of Novel 1H-Benzo[d]imidazoles Phenyl Sulfonylpiperazines. *Pharmaceuticals* **2012**, *5*, 460-468

© 2012 by the authors; licensee MDPI, Basel, Switzerland. This article is an open access article distributed under the terms and conditions of the Creative Commons Attribution license (<http://creativecommons.org/licenses/by/3.0/>).
